# Supplementary material
Source: publisher site journal article supplement (https://rethinkingecology.pensoft.net/article/32751/download/suppl/31/)
Supplement: Supplementary file 1

| Animal category | Authors                    | Year | Title                                                                                                                                                                                                      | Journal                                   | Animal     | Species                                                                                                   | DNA sampling method | Reason for method                   | Method category |
|-----------------|----------------------------|------|------------------------------------------------------------------------------------------------------------------------------------------------------------------------------------------------------------|-------------------------------------------|------------|-----------------------------------------------------------------------------------------------------------|---------------------|-------------------------------------|-----------------|
| Amphibian       | Auffarth et al.            | 2017 | A genetically-informed Population Viability Analysis reveals conservation priorities for an isolated population of <i>Hyla arborea</i>                                                                     | Salamandra                                | Frog       | <i>Hyla arborea</i>                                                                                       | Buccal swabs        | Not given                           | Non-invasive    |
| Amphibian       | Cayuela et al.             | 2017 | Relatedness predicts male mating success in a pond-breeding amphibian                                                                                                                                      | Animal Behaviour                          | Toad       | <i>Bombina variegata</i>                                                                                  | Buccal swabs        | Not given                           | Non-invasive    |
| Amphibian       | Charles et al.             | 2018 | Sky, sea, and forest islands: Diversification in the African leaf-folding frog <i>Africalus paradorsalis</i> (Anura: Hyperoliidae) of the Lower Guineo-Congolian rain forest                               | Journal of Biogeography                   | Frog       | <i>Africalus paradorsalis</i>                                                                             | Lethal              | Samples to be deposited to a museum | Lethal          |
| Amphibian       | Cortazar-Chinarro et al.   | 2017 | Drift, selection, or migration? Processes affecting genetic differentiation and variation along a latitudinal gradient in an amphibian                                                                     | BMC Evolutionary Biology                  | Frog       | <i>Rana arvalis</i>                                                                                       | Lethal              | Not given                           | Lethal          |
| Amphibian       | Cox et al.                 | 2017 | Effect of the landscape matrix on gene flow in a coastal amphibian metapopulation                                                                                                                          | Conservation Genetics                     | Toad       | <i>Epidalea calamita</i>                                                                                  | Tail clipping       | Not given                           | Invasive        |
| Amphibian       | da Silva et al.            | 2018 | Conservation genetics of an endemic and threatened amphibian ( <i>Capensibufo rosei</i> ): a leap towards establishing a genetic monitoring framework                                                      | Conservation Genetics                     | Toad       | <i>Capensibufo rosei</i>                                                                                  | Toe clipping        | Toe clipping also used for marking  | Invasive        |
| Amphibian       | de Magalhaes et al.        | 2017 | Evolutionarily significant units of the critically endangered leaf frog <i>Pithecopus ayeaye</i> (Anura, Phyllomedusidae) are not effectively preserved by the Brazilian protected areas network           | Ecology and Evolution                     | Frog       | <i>Pithecopus ayeaye</i>                                                                                  | Lethal              | Not given                           | Lethal          |
| Amphibian       | Didinger et al.            | 2017 | Multiple major histocompatibility complex class I genes in Asian anurans: Ontogeny and phylogeny                                                                                                           | Developmental and Comparative Immunology  | Frog       | <i>Bufo gargarizans</i> ,<br><i>Hyla japonica</i>                                                         | Lethal              | Not given                           | Lethal          |
| Amphibian       | Dufresnes et al.           | 2017 | Cryptic invasion of Italian pool frogs ( <i>Pelophylax bergeri</i> ) across Western Europe unraveled by multilocus phylogeography                                                                          | Biological Invasions                      | Frog       | <i>Pelophylax sp.</i>                                                                                     | Buccal swabs        | Not given                           | Non-invasive    |
| Amphibian       | Dufresnes et al.           | 2018 | Invasion genetics of marsh frogs ( <i>Pelophylax ridibundus sensu lato</i> ) in Switzerland                                                                                                                | Biological Journal of the Linnean Society | Frog       | <i>Pelophylax ridibundus</i>                                                                              | Both                | Not given                           | Both            |
| Amphibian       | Faucher et al.             | 2017 | When new human-modified habitats favour the expansion of an amphibian pioneer species: Evolutionary history of the natterjack toad ( <i>Bufo calamita</i> ) in a coal basin                                | Molecular Ecology                         | Toad       | <i>Bufo calamita</i>                                                                                      | Buccal swabs        | Not given                           | Non-invasive    |
| Amphibian       | Feist et al.               | 2017 | GENETIC CHARACTERIZATION OF WEBSTER'S SALAMANDER (PLETHODON WEBSTERI) WITHIN A FRAGMENTED LANDSCAPE, USING NOVEL MICROSATELLITES                                                                           | Herpetological Conservation and Biology   | Salamander | <i>Plethodon websteri</i>                                                                                 | Tail clipping       | Not given                           | Invasive        |
| Amphibian       | Garcia et al.              | 2017 | Syntopic frogs reveal different patterns of interaction with the landscape: A comparative landscape genetic study of <i>Pelophylax nigromaculatus</i> and <i>Fejervarya limnocharis</i> from central China | Ecology and Evolution                     | Frog       | <i>Pelophylax nigromaculatus</i> ,<br><i>Fejervarya limnocharis</i>                                       | Toe clipping        | Not given                           | Invasive        |
| Amphibian       | Grummer et al.             | 2017 | Do dams also stop frogs? Assessing population connectivity of coastal tailed frogs ( <i>Ascaphus truei</i> ) in the North Cascades National Park Service Complex                                           | Conservation Genetics                     | Frog       | <i>Ascaphus truei</i>                                                                                     | Lethal              | Not given                           | Lethal          |
| Amphibian       | Gutierrez-Rodriguez et al. | 2017 | Effective to census population size ratios in two Near Threatened Mediterranean amphibians: <i>Pleurodeles waltl</i> and <i>Pelobates cultripes</i>                                                        | Conservation Genetics                     | Multiple   | <i>Pleurodeles waltl</i> ,<br><i>Pelobates cultripes</i>                                                  | Toe clipping        | Not given                           | Invasive        |
| Amphibian       | Heredia-Bobadilla et al.   | 2017 | Genetic variability and structure of an isolated population of <i>Ambystoma altamirani</i> , a mole salamander that lives in the mountains of one of the largest urban areas in the world                  | Journal of Genetics                       | Salamander | <i>Ambystoma altamirani</i>                                                                               | Tail clipping       | Not given                           | Invasive        |
| Amphibian       | Isselin-Nondedeu           | 2017 | Spatial genetic structure of <i>Lissotriton helveticus</i> L. following the restoration of a forest ponds network                                                                                          | Conservation Genetics                     | Newt       | <i>Lissotriton helveticus</i>                                                                             | Buccal swabs        | Not given                           | Non-invasive    |
| Amphibian       | Kalayci et al.             | 2017 | Phylogeny and systematics of Anatolian mountain frogs                                                                                                                                                      | Biochemical Systematics and Ecology       | Frog       | <i>Rana macracnemis</i> ,<br><i>Rana camerani</i> ,<br><i>Rana holtzi</i> , and<br><i>Rana tavasensis</i> | Toe clipping        | Not given                           | Invasive        |
| Amphibian       | Kazitsa et al.             | 2018 | Population Size, Genetic Diversity and Molecular Evidence of a Recent Population Bottleneck in <i>Hynobius chinensis</i> , an Endangered Salamander Species                                                | Asian Herpetological Research             | Salamander | <i>Hynobius chinensis</i>                                                                                 | Lethal              | Toe clipping also used for marking  | Lethal          |

|           |                          |      |                                                                                                                                                                                       |                                                             |            |                                                                   |               |                                                        |              |
|-----------|--------------------------|------|---------------------------------------------------------------------------------------------------------------------------------------------------------------------------------------|-------------------------------------------------------------|------------|-------------------------------------------------------------------|---------------|--------------------------------------------------------|--------------|
| Amphibian | Kobayashi et al.         | 2018 | Fine-scale Genetic Structure and Estimation of Gene Flow of the Japanese Brown Frog <i>Rana japonica</i> in a Satoyama Landscape on the Western Side of Inba Lake, Eastern Japan      | Current Herpetology                                         | Frog       | <i>Rana japonica</i>                                              | Lethal        | Not given                                              | Lethal       |
| Amphibian | Komaki et al.            | 2017 | Fine-scale demographic processes resulting from multiple overseas colonization events of the Japanese stream tree frog, <i>Buergeria japonica</i>                                     | Journal of Biogeography                                     | Frog       | <i>Buergeria japonica</i>                                         | Toe clipping  | Not given                                              | Invasive     |
| Amphibian | Liu et al.               | 2017 | Limited polymorphism of the functional MHC class II B gene in the black-spotted frog ( <i>Pelophylax nigromaculatus</i> ) identified by locus-specific genotyping                     | Ecology and Evolution                                       | Frog       | <i>Pelophylax nigromaculatus</i>                                  | Toe clipping  | Not given                                              | Invasive     |
| Amphibian | Marchesini et al.        | 2018 | Deciphering the drivers of negative species-genetic diversity correlation in Alpine amphibians                                                                                        | Molecular Ecology                                           | Frog       | <i>Rana temporaria</i>                                            | Lethal        | Not given                                              | Lethal       |
| Amphibian | McCartney-Melstad et al. | 2018 | Genomic data recover previously undetectable fragmentation effects in an endangered amphibian                                                                                         | Molecular Ecology                                           | Salamander | <i>Ambystoma tigrinum</i>                                         | Tail clipping | Not given                                              | Invasive     |
| Amphibian | McKee et al.             | 2017 | Habitat predictors of genetic diversity for two sympatric wetland-breeding amphibian species                                                                                          | Ecology and Evolution                                       | Multiple   | <i>Eurycea quadridigitata</i> , <i>Lithobates sphenoccephalus</i> | Lethal        | Not given                                              | Lethal       |
| Amphibian | Neal et al.              | 2018 | Genetic structure and environmental niche modeling confirm two evolutionary and conservation units within the western spadefoot ( <i>Spea hammondi</i> )                              | Conservation Genetics                                       | Toad       | <i>Spea hammondi</i>                                              | Lethal        | Not given                                              | Lethal       |
| Amphibian | Nicolas et al.           | 2018 | Phylogeography and ecological niche modeling unravel the evolutionary history of the African green toad, <i>Bufoetes boulengeri</i> (Amphibia: Bufonidae), through the Quaternary     | Journal of Zoological Systematics and Evolutionary Research | Toad       | <i>Bufoetes boulengeri</i>                                        | Lethal        | Not given                                              | Lethal       |
| Amphibian | Nishikawa et al.         | 2017 | Historical Demography of an Endangered Salamander, <i>Ranodon sibiricus</i> (Amphibia, Urodela, Hynobiidae): A Reassessment                                                           | Zoological Science                                          | Salamander | <i>Ranodon sibiricus</i>                                          | Toe clipping  | Not given                                              | Invasive     |
| Amphibian | Nunziata et al.          | 2017 | Genomic data detect corresponding signatures of population size change on an ecological time scale in two salamander species                                                          | Molecular Ecology                                           | Salamander | <i>Ambystoma talpoideum</i> , <i>A. opacum</i>                    | Toe clipping  | Not given                                              | Invasive     |
| Amphibian | O'Brien                  | 2018 | The unexpected genetic mating system of the red-backed toadlet ( <i>Pseudophryne coriacea</i> ): A species with prolonged terrestrial breeding and cryptic reproductive behaviour     | Molecular Ecology                                           | Toad       | <i>Pseudophryne coriacea</i>                                      | Lethal        | Not given                                              | Lethal       |
| Amphibian | O'Donnell et al.         | 2017 | Cryptic invasion of Northern Leopard Frogs ( <i>Rana pipiens</i> ) across phylogeographic boundaries and a dilemma for conservation of a declining amphibian                          | Biological Invasions                                        | Frog       | <i>Rana pipiens</i>                                               | Toe clipping  | Not given                                              | Invasive     |
| Amphibian | Okamiya et al.           | 2018 | Lower genetic diversity and hatchability in amphibian populations isolated by urbanization                                                                                            | Population Ecology                                          | Multiple   | <i>Hynobius tokyoensis</i> , <i>Rana ornativentris</i>            | Lethal        | Not given                                              | Lethal       |
| Amphibian | Oswald et al.            | 2017 | Conservation genetics of a mirrored population of the European tree frog ( <i>Hyla</i> )                                                                                              | Salamandra                                                  | Frog       | <i>Hyla arborea</i>                                               | Buccal swabs  | Not given                                              | Non-invasive |
| Amphibian | Pabijan et al.           | 2017 | Isolation and gene flow in a speciation continuum in newts                                                                                                                            | Molecular Phylogenetics and Evolution                       | Newt       | <i>Lissotriton vulgaris</i>                                       | Tail clipping | Not given                                              | Invasive     |
| Amphibian | Penalver-Alcazar et al.  | 2017 | Sex-dependent implications of primary productivity and conspecific density on geographical body size variation in a newt: disentangling local, large scale and genetic factors        | Journal of Biogeography                                     | Newt       | <i>Lissotriton boscai</i>                                         | Tail clipping | Not given                                              | Invasive     |
| Amphibian | Poorten et al.           | 2017 | Population genetic structure of the endangered Sierra Nevada yellow-legged frog ( <i>Rana sierrae</i> ) in Yosemite National Park based on multi-locus nuclear data from swab samples | Conservation Genetics                                       | Frog       | <i>Rana sierrae</i>                                               | Skin swabs    | Skin swabs previously used for monitoring Bd infection | Non-invasive |
| Amphibian | Rhoads et al.            | 2017 | High inbreeding and low connectivity among <i>Ambystoma texanum</i> populations in fragmented Ohio forests                                                                            | Ecology and Evolution                                       | Salamander | <i>Ambystoma texanum</i>                                          | Tail clipping | Not given                                              | Invasive     |
| Amphibian | Robertson et al.         | 2018 | Fire Does Not Strongly Affect Genetic Diversity or Structure of a Common Treefrog in the Endangered Florida Scrub                                                                     | Journal of Heredity                                         | Frog       | <i>Hyla femoralis</i>                                             | Toe clipping  | Not given                                              | Invasive     |
| Amphibian | Roland et al.            | 2017 | Y Radiation of the polymorphic Little Devil poison frog ( <i>Oophaga sylvatica</i> ) in Ecuador                                                                                       | Ecology and Evolution                                       | Frog       | <i>Oophaga sylvatica</i>                                          | Lethal        | Not given                                              | Lethal       |

|           |                        |      |                                                                                                                                                                                                                                |                                     |            |                                                                                         |                |                                                                                                                       |              |
|-----------|------------------------|------|--------------------------------------------------------------------------------------------------------------------------------------------------------------------------------------------------------------------------------|-------------------------------------|------------|-----------------------------------------------------------------------------------------|----------------|-----------------------------------------------------------------------------------------------------------------------|--------------|
| Amphibian | Sanchez-Montes et al.  | 2017 | Effects of Sample Size and Full Sibs on Genetic Diversity Characterization: A Case Study of Three Syntopic Iberian Pond-Breeding Amphibians                                                                                    | Journal of Heredity                 | Multiple   | <i>Hyla molleri</i> ,<br><i>Epidalea calamita</i> ,<br><i>Pelophylax perezi</i>         | Lethal         | Not given                                                                                                             | Lethal       |
| Amphibian | Sandberger-Loua et al. | 2018 | Gene-flow in the clouds: landscape genetics of a viviparous, montane grassland toad in the tropics                                                                                                                             | Conservation Genetics               | Toad       | <i>Nimbaphrynoides occidentalis</i>                                                     | Toe clipping   | Not given                                                                                                             | Invasive     |
| Amphibian | Savage et al.          | 2018 | Lost but not forgotten: MHC genotypes predict overwinter survival despite depauperate MHC diversity in a declining frog                                                                                                        | Conservation Genetics               | Frog       | <i>Rana chiricahuensis</i>                                                              | Toe clipping   | Toe clipping also used for marking                                                                                    | Invasive     |
| Amphibian | Smith et al.           | 2018 | Genetic divergence correlates with the contemporary landscape in populations of Slimy Salamander ( <i>Plethodon glutinosus</i> ) species complex across the lower Piedmont and Coastal Plain of the southeastern United States | Canadian Journal of Zoology         | Salamander | <i>Plethodon glutinosus</i>                                                             | Tail clipping  | Tail clipping was used to avoid destructive sampling. Salamanders readily regenerate their tails following amputation | Invasive     |
| Amphibian | Stewart et al.         | 2017 | Can alternative mating tactics facilitate introgression across a hybrid zone by circumventing female choice?                                                                                                                   | Journal of Evolutionary Biology     | Frog       | <i>Pseudacris crucifer</i>                                                              | Toe clipping   | Not given                                                                                                             | Invasive     |
| Amphibian | Teixeira et al.        | 2018 | Mitochondrial phylogeography of the Iberian endemic frog <i>Rana iberica</i> , with implications for its conservation                                                                                                          | Current Zoology                     | Frog       | <i>Rana iberica</i>                                                                     | Toe clipping   | Not given                                                                                                             | Invasive     |
| Amphibian | Valbuena-Urena et al.  | 2017 | No signs of inbreeding despite long-term isolation and habitat fragmentation in the critically endangered Montseny brook newt ( <i>Calotriton arnoldi</i> )                                                                    | Heredity                            | Newt       | <i>Calotriton arnoldi</i>                                                               | Toe clipping   | Not given                                                                                                             | Invasive     |
| Amphibian | Visser et al.          | 2017 | Stabilization of a salamander moving hybrid zone                                                                                                                                                                               | Ecology and Evolution               | Salamander | <i>Triturus cristatus</i> ,<br><i>T. marmoratus</i>                                     | Lethal         | Not given                                                                                                             | Lethal       |
| Amphibian | Wang et al.            | 2017 | Population genetic and field-ecological analyses return similar estimates of dispersal over space and time in an endangered amphibian                                                                                          | Evolutionary Applications           | Salamander | <i>Ambystoma californiense</i>                                                          | Tail clipping  | Not given                                                                                                             | Invasive     |
| Amphibian | Youngquist et al.      | 2017 | Effects of land use on population presence and genetic structure of an amphibian in an agricultural landscape                                                                                                                  | Landscape Ecology                   | Frog       | <i>Acris blanchardi</i>                                                                 | Toe clipping   | Not given                                                                                                             | Invasive     |
| Amphibian | Zhigileva et al.       | 2018 | GENETIC POLYMORPHISM IN AMPHIBIAN POPULATIONS OF PROTECTED AREAS IN THE SOUTH OF WESTERN SIBERIA AND THE URALS                                                                                                                 | Nature Conservation Research        | Multiple   | <i>Rana arvalis</i> , <i>Rana amurensis</i> , <i>Rana temporaria</i> , <i>Bufo bufo</i> | Lethal         | Not given (but in accordance with regulations)                                                                        | Lethal       |
| Bird      | Aguillon et al.        | 2017 | Deconstructing isolation-by-distance: The genomic consequences of limited dispersal                                                                                                                                            | Plos Genetics                       | Bird       | <i>Aphelocoma coerulescens</i>                                                          | Blood sampling | Not given                                                                                                             | Invasive     |
| Bird      | Armstrong et al.       | 2018 | Genomic associations with bill length and disease reveal drift and selection across island bird populations                                                                                                                    | Evolution Letters                   | Bird       | <i>Anthus berthelotii</i>                                                               | Blood sampling | Blood samples used also for parasite screening                                                                        | Invasive     |
| Bird      | Bazzi et al.           | 2017 | Candidate genes have sex-specific effects on timing of spring migration and moult speed in a long-distance migratory bird                                                                                                      | Current Zoology                     | Bird       | <i>Phylloscopus trochilus</i>                                                           | Blood sampling | Not given                                                                                                             | Invasive     |
| Bird      | Botero-Delgado et al.  | 2017 | Variation in fine-scale genetic structure and local dispersal patterns between peripheral populations of a South American passerine bird                                                                                       | Ecology and Evolution               | Bird       | <i>Aphrastura spinicauda</i>                                                            | Blood sampling | Not given                                                                                                             | Invasive     |
| Bird      | Chabot et al.          | 2018 | Migratory connectivity in the Loggerhead Shrike ( <i>Lanius ludovicianus</i> )                                                                                                                                                 | Ecology and Evolution               | Bird       | <i>Lanius ludovicianus</i>                                                              | Feathers       | Not given                                                                                                             | Non-invasive |
| Bird      | Chetverikova et al.    | 2017 | Special case among passerine birds: long-tailed tits keep family bonds during migration                                                                                                                                        | Behavioral Ecology and Sociobiology | Bird       | <i>Aegithalos caudatus caudatus</i>                                                     | Blood sampling | Not given                                                                                                             | Invasive     |
| Bird      | Costanzo et al.        | 2017 | Extrapair fertilizations vary with female traits and pair composition, besides male attractiveness, in barn swallows                                                                                                           | Animal Behaviour                    | Bird       | <i>Hirundo rustica</i>                                                                  | Blood sampling | Not given                                                                                                             | Invasive     |
| Bird      | Costanzo et al.        | 2018 | Association between extra-pair paternity and nestling sex and condition in the barn swallow                                                                                                                                    | Behavioral Ecology and Sociobiology | Bird       | <i>Hirundo rustica</i>                                                                  | Blood sampling | Not given                                                                                                             | Invasive     |
| Bird      | da Silva et al.        | 2018 | Considerations for monitoring population trends of colonial waterbirds using the effective number of breeders and census estimates                                                                                             | Ecology and Evolution               | Bird       | <i>Mycteria americana</i>                                                               | Blood sampling | Not given                                                                                                             | Invasive     |
| Bird      | da Silva et al.        | 2018 | CNVs are associated with genomic architecture in a songbird                                                                                                                                                                    | BMC Genomics                        | Bird       | <i>Parus major</i>                                                                      | Blood sampling | Not given                                                                                                             | Invasive     |
| Bird      | Dalton et al.          | 2018 | Is there genetic connectivity among the critically endangered White-winged Flufftail ( <i>Sarothrura ayresii</i> ) populations from South Africa and Ethiopia?                                                                 | African Journal of Ecology          | Bird       | <i>Sarothrura ayresii</i>                                                               | Blood sampling | Not given                                                                                                             | Invasive     |
| Bird      | Danner et al.          | 2017 | Genetic population structure in an equatorial sparrow: roles for culture and geography                                                                                                                                         | Journal of Evolutionary Biology     | Bird       | <i>Zonotrichia capensis</i>                                                             | Blood sampling | Not given                                                                                                             | Invasive     |

|      |                    |      |                                                                                                                                                                                  |                                                        |      |                                                       |                |                                     |              |
|------|--------------------|------|----------------------------------------------------------------------------------------------------------------------------------------------------------------------------------|--------------------------------------------------------|------|-------------------------------------------------------|----------------|-------------------------------------|--------------|
| Bird | Delahaie et al.    | 2017 | Narrow hybrid zones in spite of very low population differentiation in neutral markers in an island bird species complex                                                         | Journal of Evolutionary Biology                        | Bird | <i>Zosterops borbonicus</i>                           | Blood sampling | Not given                           | Invasive     |
| Bird | Dias et al.        | 2017 | Parental and alloparental investment in campo flickers ( <i>Colaptes campestris campestris</i> ): when relatedness comes first                                                   | Behavioral Ecology and Sociobiology                    | Bird | <i>Colaptes campestris campestris</i>                 | Blood sampling | Not given                           | Invasive     |
| Bird | Drovetski et al.   | 2018 | A test of the European Pleistocene refugial paradigm, using a Western Palearctic endemic bird species                                                                            | Proceedings of the Royal Society B-Biological Sciences | Bird | <i>Prunella modularis</i>                             | Blood sampling | Not given                           | Invasive     |
| Bird | Duckworth et al.   | 2017 | Hybridization Associated with Cycles of Ecological Succession in a Passerine Bird                                                                                                | American Naturalist                                    | Bird | <i>Sialia currucoides</i> ,<br><i>Sialia mexicana</i> | Blood sampling | Not given                           | Invasive     |
| Bird | Edwards et al.     | 2018 | Extra-pair parentage and personality in a cooperatively breeding bird                                                                                                            | Behavioral Ecology and Sociobiology                    | Bird | <i>Acrocephalus sechellensis</i>                      | Blood sampling | Not given                           | Invasive     |
| Bird | Ely et al.         | 2017 | Genetic structure among greater white-fronted goose populations of the Pacific Flyway                                                                                            | Ecology and Evolution                                  | Bird | <i>Anser albifrons</i>                                | Both           | Not given                           | Both         |
| Bird | FitzGerald et al.  | 2017 | Taxonomy and distribution of the imperilled Newfoundland Gray-cheeked Thrush, <i>Catharus minimus minimus</i>                                                                    | Avian Conservation and Ecology                         | Bird | <i>Catharus minimus minimus</i>                       | Blood sampling | Not given                           | Invasive     |
| Bird | Franchini et al.   | 2017 | Animal tracking meets migration genomics: transcriptomic analysis of a partially migratory bird species                                                                          | Molecular Ecology                                      | Bird | <i>Turdus merula</i>                                  | Blood sampling | Not given                           | Invasive     |
| Bird | Gienapp et al.     | 2017 | Environment-Dependent Genotype-Phenotype Associations in Avian Breeding Time                                                                                                     | Frontiers in Genetics                                  | Bird | <i>Parus major</i>                                    | Blood sampling | Not given                           | Invasive     |
| Bird | Graham et al.      | 2017 | Dispersal influences genetic and acoustic spatial structure for both males and females in a tropical songbird                                                                    | Ecology and Evolution                                  | Bird | <i>Thryophilus rufalbus</i>                           | Blood sampling | Not given                           | Invasive     |
| Bird | Hajduk et al.      | 2018 | Inbreeding, inbreeding depression, and infidelity in a cooperatively breeding bird                                                                                               | Evolution                                              | Bird | <i>Malurus cyaneus</i>                                | Blood sampling | Not given                           | Invasive     |
| Bird | Hall et al.        | 2017 | Inferring the timing of long-distance dispersal between Rail metapopulations using genetic and isotopic assignments                                                              | Ecological Applications                                | Bird | <i>Laterallus jamaicensis coturniculus</i>            | Both           | Not given                           | Both         |
| Bird | Indykiewicz et al. | 2017 | Scale-of-choice effect in the assortative mating by multiple ornamental and non-ornamental characters in the black-headed gull                                                   | Behavioral Ecology and Sociobiology                    | Bird | <i>Chroicocephalus ridibundu</i>                      | Blood sampling | Not given                           | Invasive     |
| Bird | Judkins et al.     | 2018 | Holarctic phylogeography of golden eagles ( <i>Aquila chrysaetos</i> ) and evaluation of alternative North American management approaches                                        | Biological Journal of the Linnean Society              | Bird | <i>Aquila chrysaetos</i>                              | Blood sampling | Not given                           | Invasive     |
| Bird | Kenyon et al.      | 2017 | Cultural isolation is greater than genetic isolation across an avian hybrid zone                                                                                                 | Journal of Evolutionary Biology                        | Bird | <i>Setophaga virens</i> ,<br><i>S. townsendi</i>      | Blood sampling | Not given                           | Invasive     |
| Bird | Kessler et al.     | 2018 | Mitochondrial Divergence between Western and Eastern Great Bustards: Implications for Conservation and Species Status                                                            | Journal of Heredity                                    | Bird | <i>Otis tarda</i>                                     | Feathers       | Not given                           | Non-invasive |
| Bird | Khimoun et al.     | 2017 | Landscape genetic analyses reveal fine-scale effects of forest fragmentation in an insular tropical bird                                                                         | Molecular Ecology                                      | Bird | <i>Setophaga plumbea</i>                              | Blood sampling | Not given                           | Invasive     |
| Bird | Kingston et al.    | 2017 | Heterogeneity and concordance in locus-specific differentiation and introgression between species of towhees                                                                     | Journal of Evolutionary Biology                        | Bird | <i>Pipilo maculatus</i> ,<br><i>P. ocai</i>           | Lethal         | Samples to be deposited to a museum | Lethal       |
| Bird | Kvalnes et al.     | 2017 | Reversal of response to artificial selection on body size in a wild passerine                                                                                                    | Evolution                                              | Bird | <i>Passer domesticus</i>                              | Blood sampling | Not given                           | Invasive     |
| Bird | Langin et al.      | 2017 | Partial support for the central-marginal hypothesis within a population: reduced genetic diversity but not increased differentiation at the range edge of an island endemic bird | Heredity                                               | Bird | <i>Aphelocoma insularis</i>                           | Blood sampling | Not given                           | Invasive     |
| Bird | Lee et al.         | 2017 | Genetic diversity and population structure of the Black-faced Spoonbill ( <i>Platalea minor</i> ) among its breeding sites in South Korea: Implication for conservation          | Biochemical Systematics and Ecology                    | Bird | <i>Platalea minor</i>                                 | Both           | Not given                           | Both         |
| Bird | Leedale et al.     | 2018 | Fine-scale genetic structure and helping decisions in a cooperatively breeding bird                                                                                              | Molecular Ecology                                      | Bird | <i>Aegithalos caudatus</i>                            | Blood sampling | Not given                           | Invasive     |
| Bird | Lipshutz et al.    | 2017 | Behavioural response to song and genetic divergence in two subspecies of white-crowned sparrows ( <i>Zonotrichia</i> )                                                           | Molecular Ecology                                      | Bird | <i>Zonotrichia leucophrys subsp.</i>                  | Blood sampling | Not given                           | Invasive     |
| Bird | Lundregan et al.   | 2018 | Inferences of genetic architecture of bill morphology in house sparrow using a high-density SNP array point to a polygenic basis                                                 | Molecular Ecology                                      | Bird | <i>Passer domesticus</i>                              | Blood sampling | Not given                           | Invasive     |

|      |                         |      |                                                                                                                                                                                                             |                                                        |      |                                                                                                                                               |                |                                     |              |
|------|-------------------------|------|-------------------------------------------------------------------------------------------------------------------------------------------------------------------------------------------------------------|--------------------------------------------------------|------|-----------------------------------------------------------------------------------------------------------------------------------------------|----------------|-------------------------------------|--------------|
| Bird | McLean et al.           | 2017 | Reassessment of a possible case of intraspecific gene flow across Australia's Great Dividing Range in the variegated fairy wren, <i>Malurus lamberti</i> (Aves: Maluridae), and its systematic consequences | Biological Journal of the Linnean Society              | Bird | <i>Malurus lamberti</i> subsp.                                                                                                                | Blood sampling | Not given                           | Invasive     |
| Bird | Mori et al.             | 2017 | Multilocus approach reveals an incipient differentiation process in the Stone-curlew, <i>Burhinus oedicnemus</i> around the Mediterranean basin                                                             | Conservation Genetics                                  | Bird | <i>Burhinus oedicnemus</i>                                                                                                                    | Both           | Not given                           | Both         |
| Bird | Morinha et al.          | 2017 | Extreme genetic structure in a social bird species despite high dispersal capacity                                                                                                                          | Molecular Ecology                                      | Bird | <i>Pyrhocorax pyrrhocorax</i>                                                                                                                 | Both           | Not given                           | Both         |
| Bird | Moussy et al.           | 2018 | The genetic structure of the European breeding populations of a declining farmland bird, the ortolan bunting ( <i>Emberiza hortulana</i> ), reveals conservation priorities                                 | Conservation Genetics                                  | Bird | <i>Emberiza hortulana</i>                                                                                                                     | Both           | Not given                           | Both         |
| Bird | Mueller et al.          | 2017 | Selection on a behaviour-related gene during the first stages of the biological invasion pathway                                                                                                            | Molecular Ecology                                      | Bird | <i>Euplectes afer</i>                                                                                                                         | Blood sampling | Not given                           | Invasive     |
| Bird | Mueller et al.          | 2018 | Evolution of genomic variation in the burrowing owl in response to recent colonization of urban areas                                                                                                       | Proceedings of the Royal Society B-Biological Sciences | Bird | <i>Athene cunicularia</i> )                                                                                                                   | Blood sampling | Not given                           | Invasive     |
| Bird | Nwankwo et al.          | 2018 | Rapid song divergence leads to discordance between genetic distance and phenotypic characters important in reproductive isolation                                                                           | Ecology and Evolution                                  | Bird | <i>Pogonius bilineatus</i>                                                                                                                    | Blood sampling | Not given                           | Invasive     |
| Bird | Padro et al.            | 2018 | Evidence of genetic structure in a wide-ranging and highly mobile soaring scavenger, the Andean condor                                                                                                      | Diversity and Distributions                            | Bird | <i>Vultur gryphus</i>                                                                                                                         | Feathers       | Not given (but endangered species)  | Non-invasive |
| Bird | Parolini et al.         | 2017 | Telomere length is reflected by plumage coloration and predicts seasonal reproductive success in the barn swallow                                                                                           | Molecular Ecology                                      | Bird | <i>Hirundo rustica</i>                                                                                                                        | Blood sampling | Not given                           | Invasive     |
| Bird | Perrier et al.          | 2018 | Great tits and the city: Distribution of genomic diversity and gene-environment associations along an urbanization gradient                                                                                 | Evolutionary Applications                              | Bird | <i>Parus major</i>                                                                                                                            | Blood sampling | Not given                           | Invasive     |
| Bird | Pulido-Santacruz et al. | 2018 | Morphologically cryptic Amazonian bird species pairs exhibit strong postzygotic reproductive isolation                                                                                                      | Proceedings of the Royal Society B-Biological Sciences | Bird | <i>Willisornis poecilinotus</i><br><i>griseiventris</i> , <i>W. vidua nigrigula</i> , <i>Xiphorhynchus elegans elegans</i> , <i>X. spixii</i> | Lethal         | Samples to be deposited to a museum | Lethal       |
| Bird | Radersma et al.         | 2017 | Social and spatial effects on genetic variation between foraging flocks in a wild bird population                                                                                                           | Molecular Ecology                                      | Bird | <i>Parus major</i>                                                                                                                            | Blood sampling | Not given                           | Invasive     |
| Bird | Rodriguez-Clark et al.  | 2018 | Evaluating a potential source of founders for ex situ conservation efforts: genetic differentiation between disjunct populations of the Endangered red siskin <i>Spinus cucullatus</i>                      | Endangered Species Research                            | Bird | <i>Spinus cucullatus</i>                                                                                                                      | Lethal         | Not given                           | Lethal       |
| Bird | Saetre et al.           | 2017 | Rapid polygenic response to secondary contact in a hybrid species                                                                                                                                           | Proceedings of the Royal Society B-Biological Sciences | Bird | <i>Passer italiae</i> , <i>P. hispaniolensis</i>                                                                                              | Blood sampling | Not given                           | Invasive     |
| Bird | Safari et al.           | 2018 | Certainty of paternity in two coucal species with divergent sex roles: the devil takes the hindmost                                                                                                         | BMC Evolutionary Biology                               | Bird | <i>Centropus grillii</i> , <i>C. superciliosus</i>                                                                                            | Blood sampling | Not given                           | Invasive     |
| Bird | San-Jose et al.         | 2017 | Beyond mean allelic effects: A locus at the major color gene MC1R associates also with differing levels of phenotypic and genetic (co)variance for coloration in barn owls                                  | Evolution                                              | Bird | <i>Tyto alba</i>                                                                                                                              | Blood sampling | Not given                           | Invasive     |
| Bird | Semenov et al.          | 2017 | Effects of assortative mate choice on the genomic and morphological structure of a hybrid zone between two bird subspecies                                                                                  | Molecular Ecology                                      | Bird | <i>Motacilla alba</i> subsp.                                                                                                                  | Lethal         | Samples to be deposited to a museum | Lethal       |
| Bird | Silva et al.            | 2017 | Insights into the genetic architecture of morphological traits in two passerine bird species                                                                                                                | Heredity                                               | Bird | <i>Passer domesticus</i> , <i>Ficedula albicollis</i>                                                                                         | Blood sampling | Not given                           | Invasive     |
| Bird | Soulsbury et al.        | 2018 | Age- and quality-dependent DNA methylation correlate with melanin-based coloration in a wild bird                                                                                                           | Ecology and Evolution                                  | Bird | <i>Lyrurus tetrix</i>                                                                                                                         | Blood sampling | Not given                           | Invasive     |
| Bird | Stevens et al.          | 2018 | Reduced gene flow in a vulnerable species reflects two centuries of habitat loss and fragmentation                                                                                                          | Ecosphere                                              | Bird | <i>Pomatostomus temporalis</i>                                                                                                                | Blood sampling | Not given                           | Invasive     |

|           |                         |      |                                                                                                                                                      |                                                        |         |                                                |                |           |              |
|-----------|-------------------------|------|------------------------------------------------------------------------------------------------------------------------------------------------------|--------------------------------------------------------|---------|------------------------------------------------|----------------|-----------|--------------|
| Bird      | Trewick et al.          | 2017 | Closing the gap: Avian lineage splits at a young, narrow seaway imply a protracted history of mixed population response                              | Molecular Ecology                                      | Bird    | <i>Gallirallus australis</i>                   | Blood sampling | Not given | Invasive     |
| Bird      | Valentin et al.         | 2018 | Influence of invasion history on rapid morphological divergence across island populations of an exotic bird                                          | Ecology and Evolution                                  | Bird    | <i>Cardinalis cardinalis</i>                   | Feathers       | Not given | Non-invasive |
| Bird      | van Rees et al.         | 2018 | Small-scale genetic structure in an endangered wetland specialist: possible effects of landscape change and population recovery                      | Conservation Genetics                                  | Bird    | <i>Gallinula galeata sandvicensis</i>          | Feathers       | Not given | Non-invasive |
| Bird      | Walsh et al.            | 2018 | Bidirectional adaptive introgression between two ecologically divergent sparrow species                                                              | Evolution                                              | Bird    | <i>Ammospiza nelsoni</i> , <i>A. caudacuta</i> | Blood sampling | Not given | Invasive     |
| Bird      | Zandberg et al.         | 2017 | Direct fitness benefits explain mate preference, but not choice, for similarity in heterozygosity levels                                             | Ecology Letters                                        | Bird    | <i>Parus major</i>                             | Blood sampling | Not given | Invasive     |
| Bird      | Zhen et al.             | 2017 | Genomic divergence across ecological gradients in the Central African rainforest songbird ( <i>Andropadus virens</i> )                               | Molecular Ecology                                      | Bird    | <i>Andropadus virens</i>                       | Blood sampling | Not given | Invasive     |
| Bird      | Zhu et al.              | 2018 | Low Genetic Diversity and Low Gene Flow Corresponded to a Weak Genetic Structure of Ruddy-Breasted Crake ( <i>Porzana fusca</i> ) in China           | Biochemical Genetics                                   | Bird    | <i>Porzana fusca</i>                           | Blood sampling | Not given | Invasive     |
| Carnivore | Adega et al.            | 2018 | Comparative Chromosome Painting in Genets (Carnivora, Viverridae, Genetta), the Only Known Feliforms with a Highly Rearranged Karyotype              | Cytogenetic and Genome Research                        | Genet   | <i>Genetta sp.</i>                             | Blood sampling | Not given | Invasive     |
| Carnivore | Anco et al.             | 2018 | Historical mitochondrial diversity in African leopards ( <i>Panthera pardus</i> ) revealed by archival museum specimens                              | Mitochondrial DNA Part A                               | Leopard | <i>Panthera pardus</i>                         | Faeces         | Not given | Non-invasive |
| Carnivore | Ausband et al.          | 2017 | Harvest and group effects on pup survival in a cooperative breeder                                                                                   | Proceedings of the Royal Society B-Biological Sciences | Wolf    | <i>Canis lupus</i>                             | Faeces         | Not given | Non-invasive |
| Carnivore | Ausband et al.          | 2017 | Effects of breeder turnover and harvest on group composition and recruitment in a social carnivore                                                   | Journal of Animal Ecology                              | Wolf    | <i>Canis lupus</i>                             | Faeces         | Not given | Non-invasive |
| Carnivore | Becker et al.           | 2017 | Using dogs to find cats: detection dogs as a survey method for wide-ranging cheetah                                                                  | Journal of Zoology                                     | Cheetah | <i>Acinonyx jubatus</i>                        | Faeces         | Not given | Non-invasive |
| Carnivore | Burton et al.           | 2018 | Density and distribution of a brown bear ( <i>Ursus arctos</i> ) population within the Caucasus biodiversity hotspot                                 | Journal of Mammalogy                                   | Bear    | <i>Ursus arctos</i>                            | Hair           | Not given | Non-invasive |
| Carnivore | Carvalho et al.         | 2018 | The effects of a motorway on movement behaviour and gene flow in a forest carnivore: Joint evidence from road mortality, radio tracking and genetics | Landscape and Urban Planning                           | Genet   | <i>Genetta genetta</i>                         | Blood sampling | Not given | Invasive     |
| Carnivore | Evans et al.            | 2018 | Spatial genetic patterns indicate mechanism and consequences of large carnivore cohabitation within development                                      | Ecology and Evolution                                  | Bear    | <i>Ursus americanus</i>                        | Hair           | Not given | Non-invasive |
| Carnivore | Granroth-Wilding et al. | 2017 | Non-invasive genetic monitoring involving citizen science enables reconstruction of current pack dynamics in a re-establishing wolf population       | BMC Ecology                                            | Wolf    | <i>Canis lupus</i>                             | Faeces         | Not given | Non-invasive |
| Carnivore | Grauer et al.           | 2017 | Unexpected genetic composition of a reintroduced carnivore population                                                                                | Biological Conservation                                | Marten  | <i>Martes americana</i>                        | Hair           | Not given | Non-invasive |
| Carnivore | Hollerbach et al.       | 2018 | Detection dogs allow for systematic non-invasive collection of DNA samples from Eurasian lynx                                                        | Mammalian Biology                                      | Lynx    | <i>Lynx lynx</i>                               | Faeces         | Not given | Non-invasive |
| Carnivore | Karamanlidis et al.     | 2018 | History-driven population structure and asymmetric gene flow in a recovering large carnivore at the rear-edge of its European range                  | Heredity                                               | Bear    | <i>Ursus arctos</i>                            | Hair           | Not given | Non-invasive |
| Carnivore | Karszene et al.         | 2018 | Noninvasive genetic assessment provides evidence of extensive gene flow and possible high movement ability in the African golden wolf                | Mammalian Biology                                      | Wolf    | <i>Canis anthus</i>                            | Faeces         | Not given | Non-invasive |
| Carnivore | Kojola et al.           | 2018 | Balancing costs and confidence: volunteer-provided point observations, GPS telemetry and the genetic monitoring of Finland's wolves                  | Mammal Research                                        | Wolf    | <i>Canis lupus</i>                             | Faeces         | Not given | Non-invasive |
| Carnivore | Linden et al.           | 2017 | Examining the occupancy-density relationship for a low-density carnivore                                                                             | Journal of Applied Ecology                             | Fisher  | <i>Pekania pennanti</i>                        | Hair           | Not given | Non-invasive |

|           |                       |      |                                                                                                                                                                                |                                           |                  |                                                                                                      |              |           |              |
|-----------|-----------------------|------|--------------------------------------------------------------------------------------------------------------------------------------------------------------------------------|-------------------------------------------|------------------|------------------------------------------------------------------------------------------------------|--------------|-----------|--------------|
| Carnivore | Lonsinger et al.      | 2018 | Evaluating effective population size and genetic diversity of a declining kit fox population using contemporary and historical specimens                                       | Ecology and Evolution                     | Fox              | <i>Vulpes macrotis</i>                                                                               | Faeces       | Not given | Non-invasive |
| Carnivore | Lonsinger et al.      | 2017 | The roles of habitat and intraguild predation by coyotes on the spatial dynamics of kit foxes                                                                                  | Ecosphere                                 | Multiple         | <i>Vulpes macrotis</i> ,<br><i>Canis latrans</i>                                                     | Faeces       | Not given | Non-invasive |
| Carnivore | Lonsinger et al.      | 2018 | Estimating densities for sympatric kit foxes ( <i>Vulpes macrotis</i> ) and coyotes ( <i>Canis latrans</i> ) using noninvasive genetic sampling                                | Canadian Journal of Zoology               | Multiple         | <i>Vulpes macrotis</i> ,<br><i>Canis latrans</i>                                                     | Faeces       | Not given | Non-invasive |
| Carnivore | Manlick et al.        | 2017 | Augmentation Provides Nominal Genetic and Demographic Rescue for an Endangered Carnivore                                                                                       | Conservation Letters                      | Marten           | <i>Martes sp.</i>                                                                                    | Faeces       | Not given | Non-invasive |
| Carnivore | McLennan et al.       | 2018 | Pedigree reconstruction using molecular data reveals an early warning sign of gene diversity loss in an island population of Tasmanian devils ( <i>Sarcophilus harrisii</i> )  | Conservation Genetics                     | Tasmanian devils | <i>Sarcophilus harrisii</i>                                                                          | Ear clipping | Not given | Invasive     |
| Carnivore | Mora et al.           | 2018 | Genetic structure of introduced American mink ( <i>Neovison vison</i> ) in Patagonia: colonisation insights and implications for control and management strategies             | Wildlife Research                         | Mink             | <i>Neovison vison</i>                                                                                | Both         | Not given | Both         |
| Carnivore | Morin et al.          | 2018 | Efficient single-survey estimation of carnivore density using fecal DNA and spatial capture-recapture: a bobcat case study                                                     | Population Ecology                        | bobcat           | <i>Lynx rufus</i>                                                                                    | Faeces       | Not given | Non-invasive |
| Carnivore | Mumma et al.          | 2017 | Examining spatial patterns of selection and use for an altered predator guild                                                                                                  | Oecologia                                 | Multiple         | <i>Vulpes vulpes</i> ,<br><i>Lynx canadensis</i> ,<br><i>Canis latrans</i> , <i>Ursus americanus</i> | Faeces       | Not given | Non-invasive |
| Carnivore | O'Mahony et al.       | 2017 | Non-invasively determined multi-site variation in pine marten <i>Martes martes</i> density, a recovering carnivore in Europe                                                   | European Journal of Wildlife Research     | Marten           | <i>Martes martes</i>                                                                                 | Hair         | Not given | Non-invasive |
| Carnivore | Rutledge et al.       | 2017 | Patchy distribution and low effective population size raise concern for an at-risk top predator                                                                                | Diversity and Distributions               | Wolf             | <i>Canis lycaon</i>                                                                                  | Faeces       | Not given | Non-invasive |
| Carnivore | Santos et al.         | 2017 | Can MHC-assortative partner choice promote offspring diversity? A new combination of MHC-dependent behaviours among sexes in a highly successful invasive mammal               | Molecular Ecology                         | Racoon           | <i>Procyon lotor</i>                                                                                 | Both         | Not given | Both         |
| Carnivore | Sarkar et al.         | 2018 | Ecological preferences of large carnivores in remote, high-altitude protected areas: insights from Buxa Tiger Reserve, India                                                   | Oryx                                      | Tiger            | <i>Panthera tigris</i>                                                                               | Faeces       | Not given | Non-invasive |
| Carnivore | Shaffer et al.        | 2018 | Genetic variation in the eastern spotted skunk ( <i>Spilogale putorius</i> ) with emphasis on the plains spotted skunk (S-p.)                                                  | Journal of Mammalogy                      | Skunk            | <i>Spilogale putorius</i>                                                                            | Ear clipping | Not given | Invasive     |
| Carnivore | Smith et al.          | 2018 | Evaluating the effect of forest loss and agricultural expansion on Sumatran tigers from scat                                                                                   | Biological Conservation                   | Tiger            | <i>Panthera tigris</i>                                                                               | Faeces       | Not given | Non-invasive |
| Carnivore | Srbek-Araujo et al.   | 2018 | Worrisome isolation: noninvasive genetic analyses shed light on the critical status of a remnant jaguar population                                                             | Journal of Mammalogy                      | Jaguar           | <i>Panthera onca</i>                                                                                 | Faeces       | Not given | Non-invasive |
| Carnivore | Zwijacz-Kozica et al. | 2017 | Not European wildcats, but domestic cats inhabit Tatra National Park                                                                                                           | Polish Journal of Ecology                 | Wild cat         | <i>Felis silvestris</i>                                                                              | Hair         | Not given | Non-invasive |
| Mollusc   | David et al.          | 2017 | DNA barcoding of the banded mystery snail, <i>Viviparus georgianus</i> in the Adirondacks with quantification of parasitic infection in the species                            | American Malacological Bulletin           | Marine snail     | <i>Viviparus georgianus</i>                                                                          | Lethal       | Not given | Lethal       |
| Mollusc   | Gemmell et al.        | 2018 | Genetic structure and shell shape variation within a rocky shore whelk suggest both diverging and constraining selection with gene flow                                        | Biological Journal of the Linnean Society | Marine snail     | <i>Buccinum vittatum</i>                                                                             | Lethal       | Not given | Lethal       |
| Mollusc   | Lundin et al.         | 2017 | Intersection of historical museum collections and modern systematics: a relict population of the Arctic nudibranch <i>Dendronotus velifer</i> GO Sars, 1878 in a Swedish fjord | Contributions to Zoology                  | Nudibranch       | <i>Dendronotus velifer</i>                                                                           | Lethal       | Not given | Lethal       |
| Mollusc   | Paz-Sedano et al.     | 2017 | A new <i>Okenia</i> Menke, 1830 from the Azores Islands, Portugal (Mollusca, Nudibranchia, Goniadorididae)                                                                     | Spixiana                                  | Nudibranch       | <i>Okenia menke</i>                                                                                  | Lethal       | Not given | Lethal       |
| Mollusc   | Puillandre et al.     | 2017 | A quest for the lost types of <i>Lophiotoma</i> (Gastropoda: Conoidea: Turridae): integrative taxonomy in a nomenclatural mess                                                 | Zoological Journal of the Linnean Society | Marine gastropod | <i>Lophiotoma</i>                                                                                    | Lethal       | Not given | Lethal       |

|         |                          |      |                                                                                                                                                                                                  |                                                             |                |                                            |               |                                                               |              |
|---------|--------------------------|------|--------------------------------------------------------------------------------------------------------------------------------------------------------------------------------------------------|-------------------------------------------------------------|----------------|--------------------------------------------|---------------|---------------------------------------------------------------|--------------|
| Mollusc | Rhode et al.             | 2017 | An assessment of spatio-temporal genetic variation in the South African abalone ( <i>Haliotis midae</i> ), using SNPs: implications for conservation management                                  | Conservation Genetics                                       | Marine snail   | <i>Haliotis midae</i>                      | Lethal        | Not given                                                     | Lethal       |
| Mollusc | Riquet et al.            | 2017 | Unexpected collective larval dispersal but little support for sweepstakes reproductive success in the highly dispersive brooding mollusc <i>Crepidula</i>                                        | Molecular Ecology                                           | Marine snail   | <i>Crepidula fornicata</i>                 | Lethal        | Not given                                                     | Lethal       |
| Mollusc | Robicheau et al.         | 2017 | Evidence for extreme sequence divergence between the male- and female-transmitted mitochondrial genomes in the bivalve mollusc, <i>Modiolus modiolus</i> (Mytilidae)                             | Journal of Zoological Systematics and Evolutionary Research | Mussel         | <i>Modiolus modiolus</i>                   | Lethal        | Not given                                                     | Lethal       |
| Mollusc | Sandoval-Castillo et al. | 2018 | Seascape genomics reveals adaptive divergence in a connected and commercially important mollusc, the greenlip abalone ( <i>Haliotis laevigata</i> ), along a longitudinal environmental gradient | Molecular Ecology                                           | Marine snail   | <i>Haliotis laevigata</i>                  | Lethal        | Not given                                                     | Lethal       |
| Mollusc | Song et al.              | 2017 | Genetic and evolutionary patterns of innate immune genes in the Pacific oyster <i>Crassostrea gigas</i>                                                                                          | Developmental and Comparative Immunology                    | Mussel         | <i>Crassostrea gigas</i>                   | Lethal        | Not given                                                     | Lethal       |
| Mollusc | Vallejo et al.           | 2017 | First record of the Charru mussel <i>Mytella charruana</i> d'Orbigny, 1846 (Bivalvia: Mytilidae) from Manila Bay, Luzon, Philippines                                                             | Bioinvasions Records                                        | Mussel         | <i>Mytella charruana</i>                   | Lethal        | Not given                                                     | Lethal       |
| Mollusc | Mikkelsen et al.         | 2018 | One or many? Molecular versus morphological diversity in the aplousophoran <i>Chaetoderma nitidulum</i> Loven, 1844 (Mollusca: Caudofoveata)                                                     | Journal of Molluscan Studies                                | Marine mollusc | <i>Chaetoderma nitidulum</i>               | Lethal        | Not given                                                     | Lethal       |
| Rodent  | Aguilera-Miller et al.   | 2018 | Matrilineal genealogies suggest a very low dispersal in desert rodent females                                                                                                                    | Journal of Arid Environments                                | Mouse          | <i>Chaetodipus siccus</i>                  | Lethal        | Not given                                                     | Lethal       |
| Rodent  | Baker et al.             | 2017 | Elevated mitochondrial genome variation after 50 generations of radiation exposure in a wild rodent                                                                                              | Evolutionary Applications                                   | Vole           | <i>Myodes glareolus</i>                    | Lethal        | Not given                                                     | Lethal       |
| Rodent  | Bani et al.              | 2017 | Population genetic structure and sex-biased dispersal of the hazel dormouse ( <i>Muscardinus avellanarius</i> ) in a continuous and in a fragmented landscape in central Italy                   | Conservation Genetics                                       | Dormouse       | <i>Muscardinus avellanarius</i>            | Ear clipping  | Not given                                                     | Invasive     |
| Rodent  | Bisconti et al.          | 2018 | Forest Dormouse ( <i>Dryomys nitedula</i> ) populations in southern Italy belong to a deeply divergent evolutionary lineage: implications for taxonomy and conservation                          | Hystrix-Italian Journal of Mammalogy                        | Dormouse       | <i>Dryomys nitedula</i>                    | Tail clipping | This species uses tail autotomy as an anti-predator behaviour | Invasive     |
| Rodent  | Bonnet et al.            | 2017 | Bigger Is Fitter? Quantitative Genetic Decomposition of Selection Reveals an Adaptive Evolutionary Decline of Body Mass in a Wild Rodent Population                                              | Plos Biology                                                | Vole           | <i>Chionomys nivalis</i>                   | Ear clipping  | Not given                                                     | Invasive     |
| Rodent  | Bradley et al.           | 2017 | Genetic distinctiveness of the Waikawa Island mouse population indicates low rate of dispersal from mainland New Zealand                                                                         | New Zealand Journal of Ecology                              | Mouse          | <i>Mus musculus</i>                        | Lethal        | Not given                                                     | Lethal       |
| Rodent  | Bryja et al.             | 2018 | Differentiation underground: Range-wide multilocus genetic structure of the silvery mole-rat does not support current taxonomy based on mitochondrial sequences                                  | Mammalian Biology                                           | Mole-rat       | <i>Heliophobius argenteocinereus</i>       | Lethal        | Not given                                                     | Lethal       |
| Rodent  | Bryja et al.             | 2018 | Reticulate Pleistocene evolution of Ethiopian rodent genus along remarkable altitudinal gradient                                                                                                 | Molecular Phylogenetics and Evolution                       | Mouse          | <i>Stenocephalemys sp.</i>                 | Lethal        | Not given                                                     | Lethal       |
| Rodent  | Coker et al.             | 2017 | Genetic structure of wild and domesticated grasscutters ( <i>Thryonomys swinderianus</i> ) from south-western Nigeria                                                                            | African Zoology                                             | Rat            | <i>Thryonomys swinderianus</i>             | Lethal        | Not given                                                     | Lethal       |
| Rodent  | Combs et al.             | 2018 | Spatial population genomics of the brown rat ( <i>Rattus norvegicus</i> ) in New York City                                                                                                       | Molecular Ecology                                           | Rat            | <i>Rattus norvegicus</i>                   | Lethal        | Not given                                                     | Lethal       |
| Rodent  | Greene et al.            | 2017 | Reintroduction of captive-born beach mice: the importance of demographic and genetic monitoring                                                                                                  | Journal of Mammalogy                                        | Mouse          | <i>Peromyscus polionotus trissyllepsis</i> | Tail clipping | Not given                                                     | Invasive     |
| Rodent  | Holicova et al.          | 2018 | New record of <i>Microtus mystacinus</i> in eastern Kazakhstan: phylogeographical considerations                                                                                                 | Zookeys                                                     | Vole           | <i>Microtus mystacinus</i>                 | Lethal        | Not given                                                     | Lethal       |
| Rodent  | Kyriazis et al.          | 2017 | Dynamics of genetic and morphological diversification in an incipient intra-island radiation of Philippine rodents (Muridae: <i>Bullimus</i> )                                                   | Journal of Biogeography                                     | Rat            | <i>Bullimus luzonicus</i>                  | Lethal        | Not given                                                     | Lethal       |
| Rodent  | La Haye et al.           | 2017 | Genetic monitoring to evaluate reintroduction attempts of a highly endangered rodent                                                                                                             | Conservation Genetics                                       | Hamster        | <i>Cricetus cricetus</i>                   | Hair          | Not given (endangered species)                                | Non-invasive |

|        |                |      |                                                                                                                                                                                                                |                                       |            |                                                                                                         |               |                                                                 |              |
|--------|----------------|------|----------------------------------------------------------------------------------------------------------------------------------------------------------------------------------------------------------------|---------------------------------------|------------|---------------------------------------------------------------------------------------------------------|---------------|-----------------------------------------------------------------|--------------|
| Rodent | Leo et al.     | 2017 | Microsatellite markers reveal low frequency of natural hybridization between the white-footed mouse ( <i>Peromyscus leucopus</i> ) and deer mouse ( <i>Peromyscus maniculatus</i> ) in southern Quebec, Canada | Genome                                | Multiple   | <i>Peromyscus leucopus</i> ,<br><i>Peromyscus maniculatus</i>                                           | Lethal        | Not given                                                       | Lethal       |
| Rodent | Lion et al.    | 2018 | Genetic patterns in fragmented habitats: a case study for two <i>Peromyscus</i> species in southern California                                                                                                 | Journal of Mammalogy                  | Deer mouse | <i>Peromyscus californicus</i> , <i>P. fraterculus</i>                                                  | Ear clipping  | Not given                                                       | Invasive     |
| Rodent | Lippens et al. | 2017 | Genetic structure and invasion history of the house mouse ( <i>Mus musculus domesticus</i> ) in Senegal, West Africa: a legacy of colonial and contemporary times                                              | Heredity                              | Mouse      | <i>Mus musculus</i>                                                                                     | Lethal        | Not given                                                       | Lethal       |
| Rodent | Mora et al.    | 2017 | Landscape genetics in the subterranean rodent <i>Ctenomys "chasiquensis"</i> associated with highly disturbed habitats from the southeastern Pampas region, Argentina                                          | Genetica                              | Tuco-tuco  | <i>Ctenomys "chasiquensis"</i>                                                                          | Toe clipping  | Toe clipping used because there were issues with blood sampling | Invasive     |
| Rodent | Moska et al.   | 2018 | Genetic differentiation of the edible dormouse ( <i>Glis glis</i> ) in the Polish Sudetens: the current status of an endangered species                                                                        | Journal of Zoology                    | Dormouse   | <i>Glis glis</i>                                                                                        | Hair          | Endangered species                                              | Non-invasive |
| Rodent | Ortiz et al.   | 2017 | Genetic population structure of the long-tailed pygmy rice rat ( <i>Rodentia, Cricetidae</i> ) at different geographic scales in the Argentinean Patagonia                                                     | Journal of Zoology                    | Rat        | <i>Oligoryzomys longicaudatus</i>                                                                       | Lethal        | Not given                                                       | Lethal       |
| Rodent | Seker et al.   | 2018 | Geographical Distribution Pattern of Mitochondrial DNA Cytochrome b Diversity in Populations of <i>Arvicola amphibius</i> (Linnaeus, 1758) (Mammalia: Rodentia) in Turkey as Determined by PCR-RFLP            | Acta Zoologica Bulgarica              | Vole       | <i>Arvicola amphibius</i>                                                                               | Lethal        | Not given                                                       | Lethal       |
| Rodent | Sumbera et al. | 2018 | Ethiopian highlands as a cradle of the African fossorial root-rats (genus <i>Tachyoryctes</i> ), the genetic evidence                                                                                          | Molecular Phylogenetics and Evolution | Rat        | <i>Tachyoryctes sp.</i>                                                                                 | Lethal        | Not given                                                       | Lethal       |
| Rodent | Urgoiti et al. | 2018 | Distribution and space use of seed-dispersing rodents in central Pyrenees: implications for genetic diversity, conservation and plant recruitment                                                              | Integrative Zoology                   | Multiple   | <i>Apodemus flavicollis</i> , <i>A. sylvaticus</i> , <i>Elyomys quercinus</i> , <i>Myodes glareolus</i> | Tail clipping | Not given                                                       | Invasive     |
| Rodent | Wang et al.    | 2017 | Restricted dispersal determines fine-scale spatial genetic structure of Mongolian gerbils                                                                                                                      | Current Zoology                       | Gerbil     | <i>Meriones unguiculatus</i>                                                                            | Toe clipping  | Toe clipping also used for marking                              | Invasive     |
| Rodent | Weber et al.   | 2018 | Multiple paternity in a population of free-living edible dormice ( <i>Glis glis</i> )                                                                                                                          | Mammalian Biology                     | Dormouse   | <i>Glis glis</i>                                                                                        | Buccal swabs  | Not given                                                       | Non-invasive |
